# Supplementary material for: Pulmonary Arterial Hypertension and Endothelial Dysfunction Is Linked to NADPH Oxidase-Derived Superoxide Formation in Venous Thrombosis and Pulmonary Embolism in Mice
Source: PubMed Central journal article supplement (PMC6015670; doi:10.1155/2018/1860513), 2018-06-10
Supplement: 1860513.f1.pdf [file 1860513.f1.pdf]

Supplementary figures:

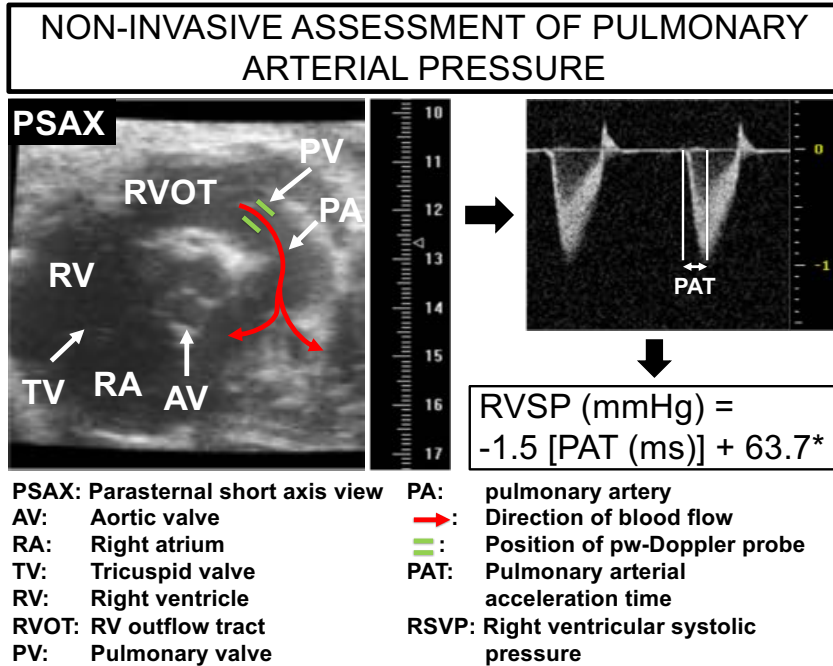

**Figure S1: Non-invasive assessment of PAP.** To allow for repetitive measurements of PAP, pulmonary arterial acceleration time (PAT) was assessed as a surrogate parameter for PAP/RVSP as described and verified by Thibault et al. [5]: Two-dimensional images of the pulmonary infundibulum were obtained from the parasternal short-axis view at the level of the aortic and pulsed-wave Doppler (pw-Doppler) recording of the pulmonary blood flow was obtained after positioning the pw- Doppler sample at the tip of the pulmonary valve leaflets and aligned to maximize laminar flow (Figure S1). As PAP/RVSP increases, PAT shortens. PAT and RVSP were shown to exhibit a linear correlation ( $RVSP [mmHg] = -1.5 \times PAT [ms] + 63.7$ ). To facilitate understanding, results were presented as PAT (ms) and as calculated RVSP\* (mmHg) with a cutoff of 21 ms (PAT)/ 32 mmHg (RVSP\*) between normal and elevated PAT [5].

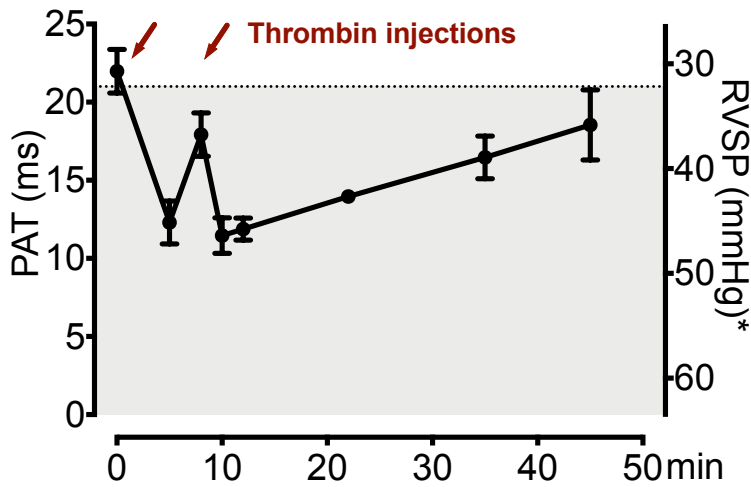

**Figure S2: Short term changes of pulmonary pressure after repetitive sublethal pulmonary embolisms.** Continuous measurements of PAT revealed a sudden PAP increase upon intravenous injection of sublethal thrombin doses (166 U/kg BW). Importantly, after a single thrombin dose, PAP decreased rapidly towards normal levels while after a second injection, PAP-normalization was decelerated. Results are presented as PAT (ms) and as calculated RVSP\* (mmHg) with a cutoff of 21 ms (PAT)/ 32 mmHg (RVSP\*) between normal and elevated PAT [5].
